# Supplementary material for: Long Noncoding RNA AFAP1-AS1 Is a Critical Regulator of Nasopharyngeal Carcinoma Tumorigenicity
Source: PubMed Central journal article supplement (PMC7719841; doi:10.3389/fonc.2020.601055), 2020-11-23
Supplement: Image_1.pdf [file Image_1.pdf]

A

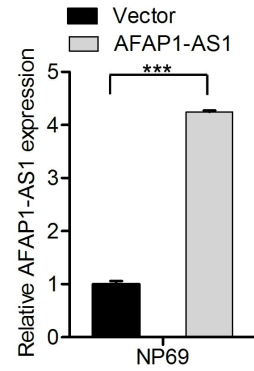

B

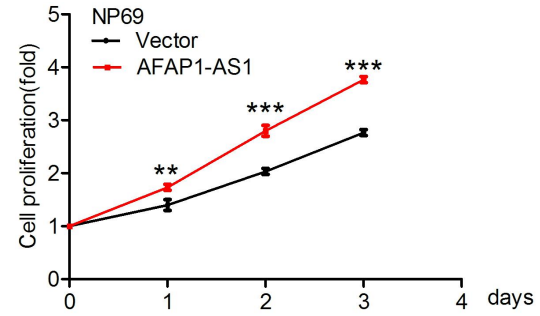

C

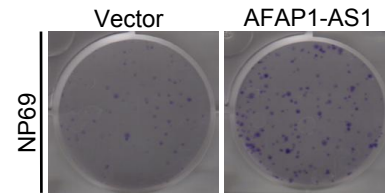

D

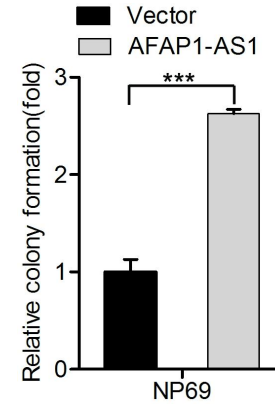

**Supplementary Figure 1. A**, qRT-PCR analysis of AFAP1-AS1 overexpression in NP69 cells. **B-C**, Representative results of cell proliferation (**B**) and colony formation assays (**C**) in NP69 cells transfected with AFAP1-AS1 overexpressing plasmid or vector. **D**, Quantification of colony formation in (**C**). Error bars represent the SD. \*\* $P < 0.01$ . \*\*\* $P < 0.001$ . Data are representative of three independent experiments.
