# Supplementary material for: Long Noncoding RNA AFAP1-AS1 Is a Critical Regulator of Nasopharyngeal Carcinoma Tumorigenicity
Source: PubMed Central journal article supplement (PMC7719841; doi:10.3389/fonc.2020.601055), 2020-11-23
Supplement: Image_2.pdf [file Image_2.pdf]

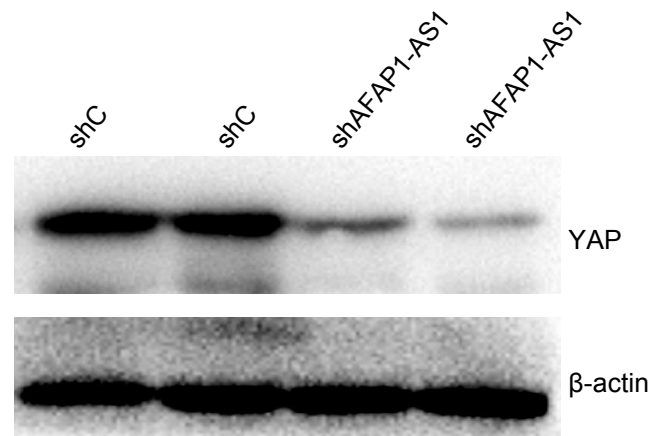

**Supplementary Figure 2.** WB analyses of effects of AFAP1-AS1 knockdown inhibited YAP expression in vivo. Tissues was from **Figure 2H**.
