# Supplementary material for: Long Noncoding RNA AFAP1-AS1 Is a Critical Regulator of Nasopharyngeal Carcinoma Tumorigenicity
Source: PubMed Central journal article supplement (PMC7719841; doi:10.3389/fonc.2020.601055), 2020-11-23
Supplement: Image_3.pdf [file Image_3.pdf]

A

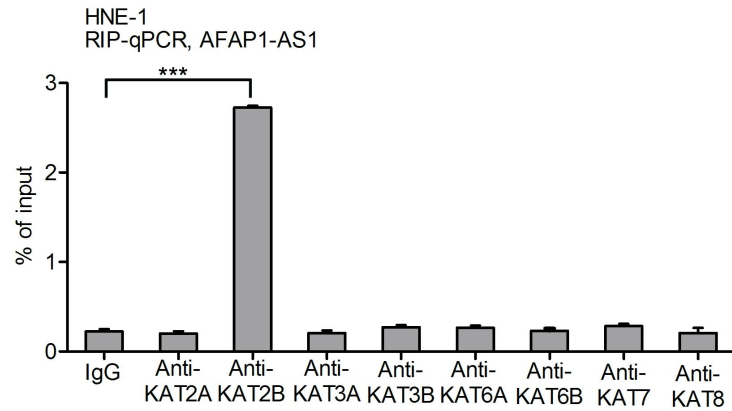

B

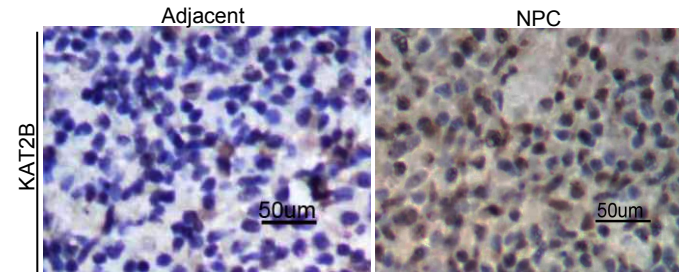

C

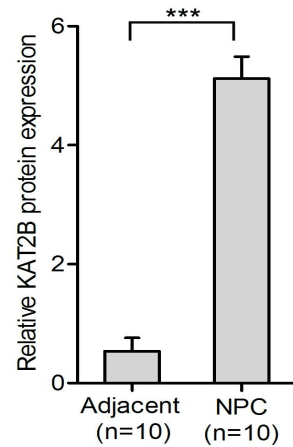

**Supplementary Figure 3.** **A**, Effects of the association of KAT2A, KAT2B, KAT3A, KAT3B, KAT6A, KAT7 or KAT8, and AFAP1-AS1. **B**, Immunohistochemistry staining assay of KAT2B in 10 pairs of freshly frozen NPC tumor and adjacent non-tumor specimens. **C**, Quantification analysis of KAT2B protein expression in **(B)**. Error bars represent the SD. \*\*\* $P < 0.001$ . Data are representative of three independent experiments.
