# Supplementary material for: Long Noncoding RNA AFAP1-AS1 Is a Critical Regulator of Nasopharyngeal Carcinoma Tumorigenicity
Source: PubMed Central journal article supplement (PMC7719841; doi:10.3389/fonc.2020.601055), 2020-11-23
Supplement: Image_5.pdf [file Image_5.pdf]

A

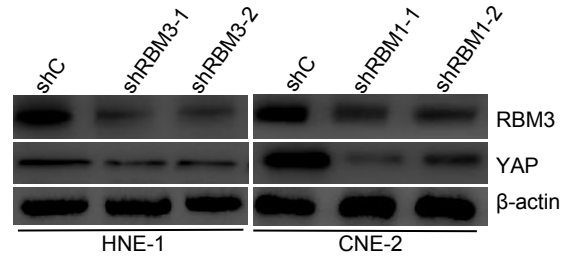

B

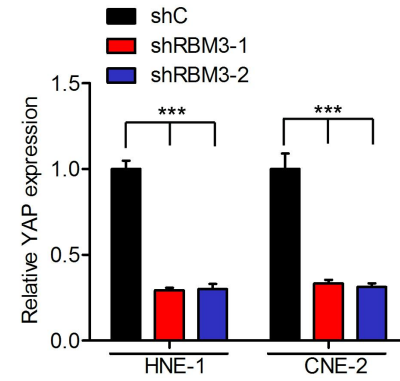

C

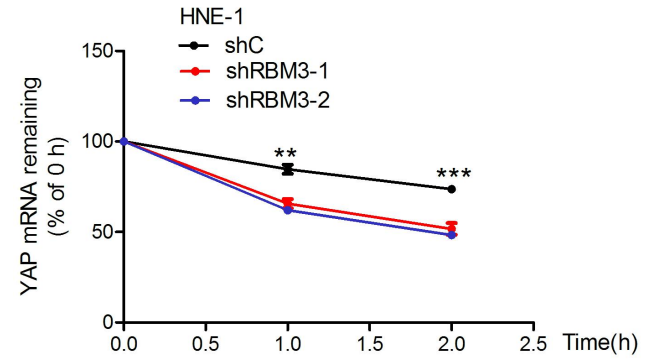

D

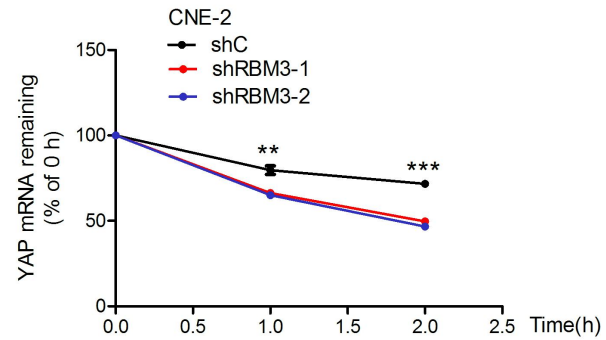

**Supplementary Figure 5. A-D**, Effects of RBM3 knockdown on YAP protein and mRNA expression, mRNA stability in HNE-1 and CNE-2 cells. Error bars represent the SD. \*\*P<0.01. \*\*\*P<0.001. Data are representative of three independent experiments.
